# Supplementary material for: Ultrafast polaron-pair dynamics in a poly(3-hexylthiophene-2,5-diyl) device influenced by a static electric field: insights into electric-field-related charge loss
Source: Royal Society of Chemistry journal article supplement (doi:10.1039/c9cp03736e), 2019-01-01
Supplement: c9cp03736e1.pdf [file c9cp03736e1.pdf]

Electronic Supplementary Information

**Ultrafast Polaron-Pair Dynamics in a Poly(3-hexylthiophene-2,5-diyl)  
Device Influenced by a Static Electric Field:  
Insights into Electric-Field-Related Charge Loss**

Debkumar Rana, Patrice Donfack, Vladislav Jovanov, Veit Wagner, and Arnulf  
Materny\*

Physics and Earth Sciences, Jacobs University Bremen, Campus Ring 1, 28759  
Bremen, Germany

\*Author for correspondence: [a.materny@jacobs-university.de](mailto:a.materny@jacobs-university.de)

## IV Characteristics of P3HT Diode

Fig. S1 shows the current-voltage (I-V) characteristics of the P3HT device measured in both dark and light. An illumination with an air mass 1.5 sun spectrum which is equivalent to a power density of  $100 \text{ mW cm}^{-2}$  was used for the measurement under light.

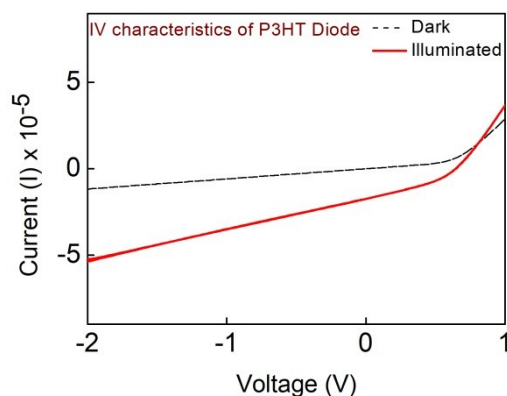

**Fig. S1** IV-characteristics of P3HT device in dark and under illumination.

## UV-Vis Absorption Spectroscopy

The UV-Vis absorption spectrum of the neat P3HT thin film has been taken in the spectral range 200 to 1100 nm using a UV-Vis absorption spectrometer (Lambda 12, PerkinElmer, USA).

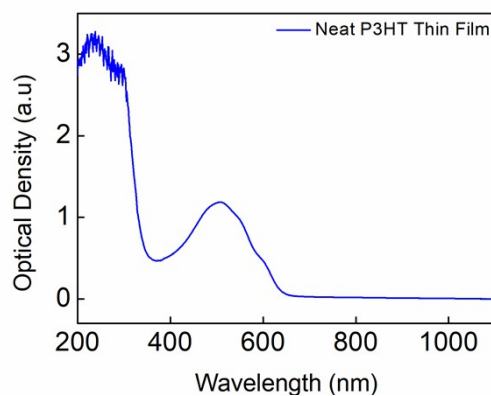

**Fig. S2** UV-Vis absorption spectrum of the neat P3HT thin film.

### Transient Absorption of Neat P3HT Thin Film (Long-Time Behaviour)

Even for relatively long delay times (here, up to 300 ps) the very slow decay part of the transient can only be recognized as constant offset.

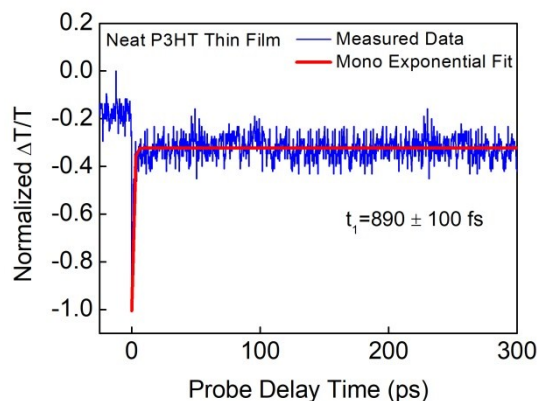

**Fig. S3** shows the normalized differential transmission measured at 650 nm in a neat P3HT thin film with  $24 \mu\text{J}/\text{cm}^2$  initial pump excitation at 520 nm. The transient has been taken averaging just three loops.

### Anisotropy Measurement for Neat P3HT Film and P3HT Device in Presence of an External Electric Field

**Table S1** Anisotropy values  $r(t)$  calculated for  $t = 0$  ps for the P3HT diode in presence of different external electric fields at an excitation fluence of  $24 \mu\text{J}/\text{cm}^2$ .

| Compare to panels of Fig. 7 | External Voltage                 | $r(t)$ for $t = 0$ ps |
|-----------------------------|----------------------------------|-----------------------|
| (a)                         | Neat P3HT Thin film (No Field)   | $0.43 \pm 0.01$       |
| (b)                         | 0 V (built-in-potential present) | $0.08 \pm 0.01$       |
| (c)                         | -1 V (in reverse Bias)           | $0.08 \pm 0.01$       |
| (d)                         | -2 V (in reverse Bias)           | $0.08 \pm 0.01$       |
| (e)                         | 0.8 V (in forward bias)          | $0.18 \pm 0.01$       |
