# Supplementary figures and images for: Ultrafast polaron-pair dynamics in a poly(3-hexylthiophene-2,5-diyl) device influenced by a static electric field: insights into electric-field-related charge loss
Source: Royal Society of Chemistry journal article supplement (doi:10.1039/c9cp03736e), 2019-01-01

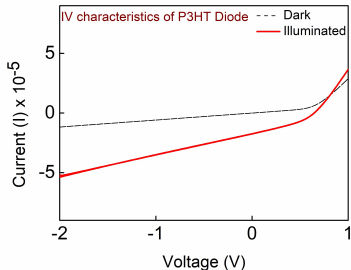

Supplement: c9cp03736e3.pdf [file c9cp03736e3.pdf]

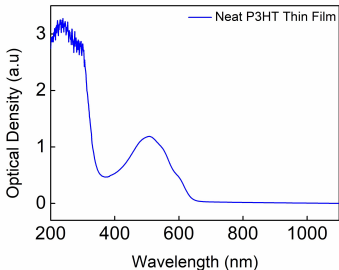

Supplement: c9cp03736e4.pdf [file c9cp03736e4.pdf]
